1 *Irx3* Promotes Gap Junction Communication Between Uterine Stromal Cells to Regulate  
2 Vascularization during Embryo Implantation

3

4 Ryan M. Brown<sup>1</sup>, Linda Wang<sup>1</sup>, Anqi Fu<sup>1</sup>, Athilakshmi Kannan<sup>2</sup>, Michael Mussar<sup>1</sup>, Indrani C.  
5 Bagchi<sup>2\*</sup>, Joan S. Jorgensen<sup>1\*</sup>

6

7 1. Department of Comparative Biosciences, University of Wisconsin-Madison, Madison, WI,  
8 United States of America

9 2. Department of Comparative Biosciences, University of Illinois at Urbana Champaign,  
10 Urbana, IL, United States of America

11

12 \*Co-corresponding authors: Indrani Bagchi and Joan S. Jorgensen

13 Email address: [ibagchi@illinois.edu](mailto:ibagchi@illinois.edu); [joan.jorgensen@wisc.edu](mailto:joan.jorgensen@wisc.edu)

14

15 Short title: *Irx3* promotes successful embryo-uterine interactions in mice

16

17 **Funding**

18 National Institutes of Health, Eunice Kennedy Shriver National Institute Of Child Health &  
19 Human Development (NIH-NICHD) R01HD075079 (JSJ)

20 National Institutes of Health, Eunice Kennedy Shriver National Institute Of Child Health &  
21 Human Development (NIH-NICHD) R01HD090066 (IB)

22 Endocrinology and Reproductive Physiology Training Grant, and National Institutes of  
23 Health (NIH-NICHD) T32HD41921 (AF).

24 **Abstract**

25 Spontaneous abortions have been reported to affect up to 43% of parous women, with over  
26 20% occurring before pregnancy is clinically diagnosed. Establishment of pregnancy is critically  
27 dependent on proper embryo-uterine interactions at the time of implantation. Besides oocyte  
28 abnormalities, implantation failure is a major contributor to early pregnancy loss. Previously, we  
29 demonstrated that two members of the Iroquois homeobox transcription factor family, IRX3 and  
30 IRX5, exhibited distinct and dynamic expression profiles in the developing ovary to promote  
31 oocyte and follicle survival. Elimination of each gene independently caused subfertility, but with  
32 different breeding pattern outcomes. *Irx3* KO (*Irx3<sup>LacZ/LacZ</sup>*) females produced fewer pups  
33 throughout their reproductive lifespan which could only be partially explained by poor oocyte  
34 quality. Thus, we hypothesized that IRX3 is also expressed in the uterus where it acts to  
35 establish functional embryo-uterine interactions to support pregnancy. To test this hypothesis,  
36 we harvested pregnant uteri from control and *Irx3* KO females to evaluate IRX3 expression  
37 profiles and the integrity of embryo implantation sites. Our results indicate that IRX3 is  
38 expressed in the endometrial stromal cells of the pregnant uterus. Notably, of the days  
39 evaluated, IRX3 expression expanded into the endometrial stroma starting at day 4 of  
40 pregnancy (D4) with peak expression at D5-6, and then greatly diminished by D7. This pattern  
41 corresponds to the critical window for implantation and remodeling of the vasculature network in  
42 mice. Further, histology and immunohistochemistry at D7 showed that while embryos were able  
43 to attach to the uterus, implantation sites in *Irx3* KO pregnant mice exhibited impaired  
44 vascularization. In addition, our results showed significantly diminished expression of  
45 decidualization markers and disruptions in GJA1 organization in the decidual bed. These data,  
46 taken together with previous reports focused on the ovary, suggest that IRX3 promotes fertility  
47 via at least two different mechanisms: 1) promoting competent oocytes and 2) facilitating  
48 functional embryo-uterine interactions during implantation. Future research aims to tease apart

49 the roles for IRX3 in the oocyte versus the uterus and the mechanisms by which it promotes  
50 early embryo survival and a successful pregnancy outcome.

51

## 52 **Introduction**

53 Embryo implantation is achieved when a competent oocyte is fertilized and then  
54 develops into a blastocyst capable of facilitating embryo-uterine interactions with the receptive  
55 endometrium. In humans, it has been reported that approximately two thirds of pregnancies are  
56 lost due to implantation failure. Uncovering the signaling pathways and downstream mediators  
57 that govern implantation are necessary to improve outcomes associated with defective embryo  
58 implantation including ectopic pregnancies, implantation failure and infertility (reviewed in [1]).

59 In the mammalian uterus, steroid hormones estrogen and progesterone induce structural  
60 and functional changes during early pregnancy to support embryo implantation [2-5]. Of these  
61 changes, uterine stromal differentiation, or decidualization, is a critical response to embryo  
62 recognition that initiates extensive tissue remodeling for proper maternal-fetal interactions  
63 during early pregnancy. During decidualization, the endometrial stromal cells of the uterus  
64 undergo differentiation into decidual cells with unique biosynthetic and secretory profiles needed  
65 to promote tissue transformation and uterine vascular remodeling [6-8]. In the murine model,  
66 implantation begins on day (D)4 midnight, with the majority of decidualization occurring between  
67 D5-8, and establishment of pregnancy by D10-11 of gestation [9]. Complementary timing occurs  
68 in the human uterus where, for a short window of time, during the mid-secretory phase of each  
69 menstrual cycle, the uterus becomes “receptive” to embryo implantation and the decidualization  
70 process begins [10]. In both the mouse and human, decidualization promotes tissue remodeling  
71 and neovascularization, which are critical events for successful establishment of pregnancy. A  
72 major challenge is deciphering the signaling mechanisms governing successful maternal-fetal  
73 interactions during early pregnancy. To this end, it is necessary to identify and characterize  
74 factors that regulate decidualization and angiogenesis during embryo implantation.

75           The Iroquois factors are highly conserved proteins that have been implicated in  
76    patterning and embryogenesis in animal kingdoms spanning invertebrate to vertebrate. In  
77    mammals, there are a total of six Iroquois genes clustered in two groups, with cluster A  
78    (*Irx1,2,4*) and cluster B (*Irx3,5,6*) located on chromosomes 5 and 16 in the human and 8 and 13  
79    in the mouse, respectively [11, 12]. Previously, we discovered that null mutation of both *Irx3* and  
80    *Irx5* resulted in abnormal granulosa cell morphology and disrupted granulosa cell-oocyte  
81    interactions [13]. A closer look, using *Irx3<sup>LacZ/LacZ</sup>* single knockout mice, revealed that although  
82    mutant females could become pregnant, loss of *Irx3* caused a decrease in birthrate to  
83    approximately half as many pups compared to controls throughout a 6-month breeding study.  
84    While *Irx3<sup>LacZ/LacZ</sup>* females demonstrated abnormalities in follicle survival, this did not fully explain  
85    the subfertility phenotype [13].

86           Although evidence points to an oocyte deficit with loss of *Irx3*, ovarian histology led us to  
87    hypothesize that another facet in the female reproductive axis could be disrupted. Due to the  
88    decrease in pup accumulation over time, we hypothesized that embryo implantation was  
89    compromised due to loss of *Irx3*. Evaluation of implantation sites within *Irx3<sup>LacZ/LacZ</sup>* pregnant  
90    females demonstrated impaired vascularization and a significant reduction in pups by D7 of  
91    pregnancy. Herein, we report for the first time that *Irx3* is expressed in the mouse uterus  
92    overlapping the window of implantation when it plays a critical role in neoangiogenesis. Our  
93    results suggest disruptions are caused by unorganized gap junction (GJA1) protein expression.  
94    Together, these findings reveal the multifaceted role of *Irx3* in female fertility.

95

## 96    **Materials and Methods**

### 97    Ethics Statement

98           Animals were euthanized by CO<sub>2</sub> asphyxiation followed by cervical dislocation. Animal  
99    housing and all described procedures were reviewed and approved by the Institutional Animal  
100    Care and Use Committee at the University of Wisconsin – Madison and were performed in

101 accordance with National Institute of Health Guiding Principles for the Care and Use of  
102 Laboratory Animals.

103

104 Animals

105 Mice were housed in disposable, ventilated cages (Innovive, San Diego, CA). Rooms  
106 were maintained at  $22 \pm 2^\circ\text{C}$  and 30–70% humidity on a 12-hour light/dark cycle. Mouse strains  
107 included CD1 outbred mice (CrI:CD1(ICR), Charles River, Wilmington, MA, USA) and *Irx3<sup>LacZ</sup>*  
108 [14], all of which were maintained on a CD1 genetic background. Genotyping was carried out as  
109 previously reported [13, 14]. Pregnancies were the result of breeding between CD1 (WT control)  
110 or *Irx3<sup>LacZ/LacZ</sup>* females and CD1 males. Thus, all embryos generated in *Irx3<sup>LacZ/LacZ</sup>* females were  
111 *Irx3<sup>+LacZ</sup>*. Timed mating was identified as the presence of a vaginal plug after mating which was  
112 designated as day 1 (D1) of pregnancy.

113

114 Tissue Processing and Histology

115 Uterine tissue was harvested at the indicated timepoints, fixed in 10% neutral buffer  
116 formalin (NBF) in phosphate buffer saline (PBS) at  $4^\circ\text{C}$  overnight. Uteri were collected on D7 of  
117 gestation, dehydrated through an ethanol gradient, cleared in xylene and embedded in paraffin.  
118 Paraffin blocks were sectioned at  $5\mu\text{m}$  thickness, mounted on slides and then stained with  
119 hematoxylin and eosin (H&E) for histological analysis.

120

121 Immunohistochemistry/Immunofluorescence

122 Uterus tissue sections were deparaffinized in xylene, rehydrated through a series of  
123 ethanol washes, and then rinsed in water. Antigen retrieval was performed by immersing the  
124 slides in 0.1M citrate buffer solution at pH 6.0 or EDTA buffer at pH 8 depending on antibody  
125 specifications (Table S1), and heated in a water bath at  $80^\circ\text{C}$  for 25 min. The slides were

126 allowed to cool, rinsed in water, followed by PBS washes. Slides were then incubated at room  
127 temperature with 10% donkey solution for 1h before incubating them with primary antibody  
128 overnight at 4°C. The following morning, tissues were washed in PBS before incubating with  
129 secondary antibody for 1 hour, then washed with PBS, incubated with a 10X DAPI (4',6-  
130 diamidino-2-phenylindole) in PBS solution (1:500) as a nuclear counterstain for 10 minutes,  
131 followed by 3 minutes with Vector True View Kit (Vector Laboratories, SP-8400, Burlingame,  
132 CA), and mounted. Immunofluorescence was repeated in uterine sections collected from at  
133 least 3 animals. Quantification of IHC was performed using Image J, the mean fluorescence  
134 intensity of CD31 (n=3 for each group) or GJA1 (n = 3-4 for each group) were quantified using  
135 the ROI manager on both the mesometrial and anti-mesometrial regions surrounding the  
136 embryo. Images were collected on a Leica SP8 confocal microscope for IHC and a Keyence  
137 BZ-X700 microscope for H&E.

138

139 Quantitative real time PCR analysis (qPCR)

140 Uterine tissue was homogenized, and total RNA was extracted using TRIZOL reagent  
141 (Invitrogen, 15596026, Waltham, MA, USA), according to the manufacturer's protocol and  
142 quantified using a NanoDrop 2000. 500ng from each sample was used for First-Strand cDNA  
143 synthesis by SuperScriptII (Invitrogen, AM9515, Waltham, MA, USA). cDNA was diluted 1:5 and  
144 then 2µl was added to 5ul SYBR green PCR mixture (BioRad, 1725271, Hercules, CA, USA),  
145 2.4ul water and 1.25 pmol primer mix. PCR reactions were carried out using the BioRad CFX96  
146 system and RNA transcripts were quantified using the  $\Delta\Delta C_t$  method (Livak & Schmittgen, 2001).  
147 Primers, *36b4* 5' – CGACCTGGAAGTCCAACACTAC – 3' R: 5' – ATCTGCTGCATCTGCTTG - 3'  
148 and *Irx3* F: 5' - CGCCTCAAGAAGGAGAACAAGA - 3', R: 5' - CGCTCGCTCCCATAAGCAT - 3'  
149 (IDT, Coralville, IA, USA)

150

151 Statistics

152 Statistics between groups were carried out using a two-sample t-test. Results were  
153 considered statistically significant if p-values were  $\leq 0.05$ .

154

## 155 Results

156 *Irx3*<sup>LacZ/LacZ</sup> females exhibit defects in uterine vascularization with a marked reduction in  
157 implanted embryos

158 Previously, we determined that *Irx3*<sup>LacZ/LacZ</sup> females produced significantly fewer live pups  
159 over time compared to their controls, resulting in a subfertility phenotype. Ovarian histology and  
160 follicle counts identified oocyte deficits, but reproductive data suggested other factors were also  
161 contributing to the subfertility phenotype [13]. To understand the impact of *Irx3* on female  
162 fertility, we expanded our evaluation to examine uterine contributions of *Irx3* on fertility using  
163 *Irx3*<sup>LacZ/LacZ</sup> mice and their littermate controls over time. We investigated the integrity of  
164 implantation sites on D7 of pregnancy. Histological analysis of *Irx3*<sup>LacZ/LacZ</sup> (Fig 1B, D) and  
165 control (Fig 1A, C) implantation sites at D7 of gestation demonstrate that loss of *Irx3* impairs  
166 uterine vascularization, as depicted in the white boxes (Fig 1 A-D). To investigate whether  
167 impaired implantation and defective vascularity were a result of hormonal deficiency, we  
168 measured circulating estrogen and progesterone (Fig 1 E, F). Results showed that, estrogen  
169 and progesterone levels were comparable between *Irx3*<sup>LacZ/LacZ</sup> and litter mate controls. To  
170 assess when embryos were being lost in *Irx3*<sup>LacZ/LacZ</sup> females, we compared the number of  
171 implanted embryos to that of control mice on D7 and D11 of gestation (Fig 1 G). By D7 we saw  
172 a significant decrease in the number of pups *in utero* in the *Irx3*<sup>LacZ/LacZ</sup> mice; however, there was  
173 no further reduction in pups between D7 and D11 indicating that pups were being lost during the  
174 decidual phase of pregnancy. Together these data demonstrate that *Irx3* has a role in female  
175 fertility with implications in uterine angiogenesis during embryo implantation.

176

177 *Irx3* expression is confined to a discrete window during embryo implantation.

178 Evidence of vascularity deficits within embryo implantation sites and early embryo loss  
179 suggested a role for *Irx3* in uterine implantation. Thus, we examined the protein and transcript  
180 profile of *Irx3* in the mouse uterus during normal pregnancy. Late on D4 of gestation, the mouse  
181 uterus is receptive, and implantation ensues. At this time IRX3 protein expression is detected  
182 predominately in the cytoplasm of the epithelial cells surrounding the lumen and uterine glands  
183 (Fig 2A, B). By D5, which is the onset of endometrial stromal cell decidualization, IRX3 protein  
184 expression is substantially increased, with expression expanding to the uterine stroma (S)  
185 immediately surrounding the embryo (E), also referred to as the primary decidual zone (Fig 2 C,  
186 D). Similarly, at D6 of gestation, IRX3 expression is prominently expressed throughout the  
187 decidualized stroma, expanding further into the secondary decidual zone (Fig 2 E, F). On D7 of  
188 gestation, nearing the end of the decidualization process, IRX3 protein expression is diminished  
189 (Fig 2 G, H). Analysis of *Irx3* transcripts demonstrate a complimentary profile with expression  
190 initially documented at D4, followed by substantial increases at the onset of decidualization at  
191 D5 and D6 and a sharp decline toward the end of decidualization on D7. These data  
192 demonstrate that *Irx3* is induced in endometrial stromal cells at the onset of embryo  
193 implantation, the expression peaks during decidualization, and declines with the cessation of  
194 decidual phase of pregnancy.

195

196 Endometrial stromal cell differentiation is impaired in *Irx3*<sup>LacZ/LacZ</sup> females

197 The close spatio-temporal relationship between *Irx3* expression and the progression of  
198 decidualization led us to hypothesize that *Irx3* may play a role in this process. We, therefore,  
199 evaluated the expression of known regulators of decidualization in *Irx3*<sup>LacZ/LacZ</sup> and control uteri.  
200 Implantation sites were harvested at D7 and processed for RNA isolation and  
201 immunofluorescence. Results show that as expected, *Irx3* expression was already low in WT  
202 uteri at D7 (set to 1) and detectable, but extremely low (75-80% decreased) in the mutant



203 decidua. Any transcripts present were likely derived from embryo tissue contamination. While  
204 steroid receptor genes, *Esr1* and *Pgr1* remained unchanged, all other decidual markers were  
205 significantly decreased in mutant versus wild type implantation sites (Fig 3A). Further, HAND2  
206 expression was weak in *Irx3*<sup>LacZ/LacZ</sup> D7 stroma compared to wild type as indicated by  
207 immunofluorescent analysis (Fig 3B), supporting qPCR results and suggesting defective  
208 decidualization.

209

### 210 Compromised neoangiogenesis in the decidual bed of *Irx3* KO females

211 To further evaluate the vascularization defect found in *Irx3*<sup>LacZ/LacZ</sup> implantation sites, we  
212 examined whether loss of *Irx3* expression affected angiogenesis. Thus, we analyzed the  
213 angiogenic response in *Irx3*<sup>LacZ/LacZ</sup> uteri by monitoring an endothelial cell marker, CD31 (platelet  
214 endothelial cell adhesion molecule-1, PECAM-1), at D7 of gestation (Fig 4 A-G). As expected,  
215 implantation sites from control mice exhibited prominent CD31 expression in both the  
216 antimesometrial (AM) and mesometrial (M) areas on day 7 of pregnancy (Fig 4 A, C, E). In  
217 contrast, while expression of CD31 in *Irx3*<sup>LacZ/LacZ</sup> implantation sites was not different in the  
218 mesometrial side (Fig 4D, G), quantification of expression showed a significant decrease of  
219 CD31 expression in the antimesometrial region (Fig 4B, F, G). The decrease in the level of  
220 CD31 at the implantation site of *Irx3*<sup>LacZ/LacZ</sup> uteri on D7 raises the possibility that *Irx3* is  
221 mediating embryo-uterine interactions through promotion of a robust angiogenic response  
222 during implantation.

223

### 224 Fewer and unorganized gap junction connections in *Irx3*<sup>LacZ/LacZ</sup> uteri

225 To gain insights on the impact of *Irx3* loss on decidualization and vascularization, we  
226 investigated GJA1, a gap junction protein critical in modulating stromal differentiation and  
227 neovascularization during murine implantation [15]. In our previous investigations, *Irx3*<sup>LacZ/LacZ</sup>  
228 ovaries demonstrated no change in *Gja1* transcripts between mutant and control, but they

229 detected abnormal deposition of GJA1, which resulted in follicle death [13]. Based on these  
230 data, we tested whether loss of *Irx3* in the uterus would impair GJA1 expression during embryo  
231 implantation. Complementary to our ovarian expression data, we found that loss of *Irx3* resulted  
232 in no change in *Gja1* transcripts (Fig 5A), but significantly disrupted GJA1 protein localization in  
233 both mesometrial and anti-mesometrial regions of the uterine stroma (Fig 5 B-J). Together these  
234 data suggest that *Irx3* functions to promote embryo implantation through appropriate cell-cell  
235 communication to provide the proper environment for successful decidualization and  
236 neovascularization.

237

## 238 Discussion

239 The Iroquois genes have been implicated in embryonic patterning and can be found in a  
240 range of tissues, with roles in organization of the spinal cord, limb, bone and heart, to name a  
241 few [12, 16-18]. Previously, we identified IRX3 and IRX5 expression in mouse ovaries, but not  
242 testis, starting after sex determination [19]. This led to a series of investigations to discern the  
243 role of IRX3 and IRX5 in the ovary during development. Using mutant mice lacking both *Irx3*  
244 and *Irx5*, we discovered mutant ovaries had abnormal granulosa cell morphology and disturbed  
245 granulosa cell-oocyte interactions [13]. A closer look at ablation of *Irx3* alone, using *Irx3<sup>LacZ/LacZ</sup>*  
246 mutant females, indicated that loss of *Irx3* caused reduced follicle numbers; however, this did  
247 not fully explain the profound deficit in fertility as indicated by at least 50% loss in live pup births  
248 compared to wild type females [20]. This prompted us to investigate whether IRX3 was affecting  
249 embryo implantation. Results from the current study suggest multifaceted roles for IRX3 in  
250 female fertility that include important functions in both ovary and pregnant uterus. In particular,  
251 we report that IRX3 functions in early pregnancy to establish successful embryo-uterine  
252 interactions. These data provide a foundation for new discoveries of how IRX3 functions in a  
253 spatiotemporal manner in the uterus to promote successful embryo-uterine interactions via

254 establishment of proper cell-cell communications to support both decidualization and  
255 angiogenesis.

256 Establishment of a robust and healthy vascular network is essential for reproduction as it  
257 supports folliculogenesis, ovarian hormone production, ovulation, implantation and embryonic  
258 growth [21-23]. Evaluation of the integrity of *Irx3*<sup>LacZ/LacZ</sup> implantation sites on D7 revealed  
259 reduced vascularity with a concomitant decline in the number of implanted embryos, indicating  
260 disruptions in reproductive fecundity in *Irx3*<sup>LacZ/LacZ</sup> mice. Together these data demonstrate that  
261 *Irx3* has a role in uterine angiogenesis during embryo implantation.

262 In the murine model, implantation begins late on day D4 when the mouse uterus is  
263 receptive to implantation [24]. At D5, the decidualization process begins and the stromal cells of  
264 the uterus differentiate into a unique secretory tissue, the decidua. The stromal cells  
265 immediately surrounding the embryo are transformed into the primary decidual cells and further  
266 expand into the secondary decidual cells until the invasive period is complete [9]. Here, we  
267 demonstrate that the expression profile of *IRX3* in uterine stromal cells is intimately associated  
268 with the decidualization phase of mouse pregnancy. Notably, during the mid-secretory phase of  
269 the human menstrual cycle, studies show that *IRX3* expression increases as the uterus  
270 becomes receptive to implantation [25-27]. Contrary to mice, the human uterus begins  
271 decidualizing in the nonpregnant state, during the mid-secretory phase with an expansion of  
272 decidualization once the pregnancy is established [28]. Taken together, these data and our  
273 studies have uncovered a conserved physiological timing of *Irx3* expression in the human and  
274 murine uterus that corresponds to the onset of decidualization in both species.

275 As decidualization progresses, the uterus undergoes expansive tissue remodeling,  
276 critical for proper maternal-fetal interactions. Following the attachment of the blastocyst to the  
277 uterine epithelium, the underlying stromal cells differentiate into decidual cells with unique  
278 biosynthetic and secretory profiles needed to promote this transformation. We found that *IRX3*  
279 is robustly induced in the decidual tissue during a critical time frame in mouse implantation and

280 angiogenesis. Factors secreted by the decidualizing stromal cells promote tissue and vascular  
281 remodeling, thus, it is conceivable that IRX3, produced by the decidualizing stromal cells, has a  
282 role in preparing the uterus for appropriate embryo-uterine interactions. Examination of the  
283 decidual program in *Irx3<sup>LacZ/LacZ</sup>* uteri indicated that initial aspects of the decidualization process  
284 are impaired in these mice. It has been suggested that stromal differentiation and angiogenesis  
285 are intimately connected processes during pregnancy [15]. Along with a difference in the  
286 presence of a subset of decidualization markers, we also observed a substantial decrease in  
287 CD31 expression, an endothelial cell marker, in the *Irx3<sup>LacZ/LacZ</sup>* implantation sites. Collectively,  
288 the reduction in vascularization seen at D7 by both histological analysis and  
289 immunohistochemistry, demonstrates that ablation of *Irx3* leads to improper vascularization in  
290 the mouse uterus during early pregnancy.

291         Previously, we identified that loss of both *Irx3* and *Irx5* impaired gap junction protein  
292 deposition in ovarian follicles, leading to follicle and oocyte death [13]. Here, we discovered a  
293 potentially conserved role for *Irx3* in mediating proper cell-cell communication via gap junction  
294 expression during embryo implantation. Early studies identified 3 connexins in the human  
295 uterus; connexin 26, connexin 32, and connexin 43 [29]. Of these, connexin 43 (GJA1) is the  
296 predominant subtype expressed in human and mouse endometrium and localized almost  
297 exclusively to the stroma, connecting decidual cells [30]. Conditional knockout of *Gja1* in the  
298 mouse uterus resulted in severe subfertility with aberrant differentiation of the uterine stroma  
299 and significant reduction in VEGF [15]. Further, maternal decidua isolated from women with  
300 recurrent early pregnancy loss was found to have reduced *Gja1* transcripts and protein when  
301 compared to controls [31]. The importance of GJA1 regulation during pregnancy is augmented  
302 by epidemiological studies that identified taking mefloquine, an anti-malarial compound that  
303 blocks GJA1, as a risk factor for spontaneous abortion [32]. Here, our data indicates that IRX3  
304 is instrumental in mediating proper cell-cell communication via GJA1 expression. In the uterus  
305 and ovary, GJA1 serves a critical role in establishing communications between cells, promoting

306 both oocyte competence in the ovary and angiogenesis in the uterus during pregnancy [15, 33,  
307 34]. Our results indicate that IRX3 promotes successful cell-cell connections allowing for  
308 appropriate intercellular cross talk throughout the intimate correspondence of embryo  
309 implantation and angiogenesis during pregnancy.

310 Embryo implantation is achieved when a competent oocyte develops into a blastocyst  
311 capable of facilitating embryo-uterine interactions with the receptive endometrium. It is clear that  
312 IRX3 has a significant role in mouse reproductive health including oocyte competence and  
313 endometrial angiogenesis [15, 33, 34]. Impaired uterine receptivity and poor vascularization are  
314 major causes of early pregnancy loss. Therefore, understanding how *Irx3* is regulated during  
315 this critical window of implantation may provide insights and solutions for female reproductive  
316 health and fertility.

## **Acknowledgements**

We thank all members of the Jorgensen laboratory for comments and support. We thank Emily Huber and Eowyn Liu for their help with sectioning. We truly appreciate all of the comments, advice, and technical support from the Developmental Endocrinology Group at the University of Wisconsin – Madison School of Veterinary Medicine. We are immensely grateful for Miranda Sun and Daniel Radecki for their support in microscopy trainings and Image J. We would also like to show our gratitude to Annie Novak and Tori Gronemeyer for their exemplary mouse husbandry work.

## Reference List

1. Kim SM, Kim JS. A Review of Mechanisms of Implantation. *Dev Reprod* 2017; 21:351-359.
2. Psychoyos A. Implantation. In: Greep ROA, E.G.; Geiger, S.R. (ed.) *Handbook of Physiology*. Washington D.C.: American Physiology Society; 1973: 187-215.
3. Yoshinaga K. Uterine receptivity for blastocyst implantation. *Ann N Y Acad Sci* 1988; 541:424-431.
4. Parr MBP, E.L. The Implantation Reaction. In: Wynn RMJ, W.P. (ed.) *Biology of the Uterus*. New York: Plenum Press; 1989: 233-277.
5. Weitlauf HM. Biology of Implantation. In: Knobil EaN, J.D. (ed.) *The Physiology of Reproduction*. New York: Raven Press Ltd.; 1994: 391-440.
6. Cross JC, Werb Z, Fisher SJ. Implantation and the placenta: key pieces of the development puzzle. *Science* 1994; 266:1508-1518.
7. Giudice LC, Irwin JC. Roles of the insulinlike growth factor family in nonpregnant human endometrium and at the decidual: trophoblast interface. *Semin Reprod Endocrinol* 1999; 17:13-21.
8. Carson DD, Bagchi I, Dey SK, Enders AC, Fazleabas AT, Lessey BA, Yoshinaga K. Embryo implantation. *Dev Biol* 2000; 223:217-237.
9. Ramathal CY, Bagchi IC, Taylor RN, Bagchi MK. Endometrial decidualization: of mice and men. *Semin Reprod Med* 2010; 28:17-26.
10. Gomez E, Ruiz-Alonso M, Miravet J, Simon C. Human Endometrial Transcriptomics: Implications for Embryonic Implantation. *Cold Spring Harb Perspect Med* 2015; 5:a022996.
11. Bosse A, Stoykova A, Nieselt-Struwe K, Chowdhury K, Copeland NG, Jenkins NA, Gruss P. Identification of a novel mouse Iroquois homeobox gene, *Irx5*, and chromosomal localisation of all members of the mouse Iroquois gene family. *Dev Dyn* 2000; 218:160-174.
12. Peters T, Dildrop R, Ausmeier K, Ruther U. Organization of mouse Iroquois homeobox genes in two clusters suggests a conserved regulation and function in vertebrate development. *Genome Res* 2000; 10:1453-1462.
13. Fu A, Oberholtzer SM, Bagheri-Fam S, Rastetter RH, Holdreith C, Caceres VL, John SV, Shaw SA, Krentz KJ, Zhang X, Hui CC, Wilhelm D, et al. Dynamic expression patterns of *Irx3* and *Irx5* during germline nest breakdown and primordial follicle formation promote follicle survival in mouse ovaries. *PLoS Genet* 2018; 14:e1007488.
14. Zhang SS, Kim KH, Rosen A, Smyth JW, Sakuma R, Delgado-Olguin P, Davis M, Chi NC, Puvion-Vandier N, Gaborit N, Sukonnik T, Wylie JN, et al. Iroquois homeobox gene 3

- establishes fast conduction in the cardiac His-Purkinje network. *Proceedings of the National Academy of Sciences of the United States of America* 2011; 108:13576-13581.
15. Laws MJ, Taylor RN, Sidell N, DeMayo FJ, Lydon JP, Gutstein DE, Bagchi MK, Bagchi IC. Gap junction communication between uterine stromal cells plays a critical role in pregnancy-associated neovascularization and embryo survival. *Development* 2008; 135:2659-2668.
  16. Cavodeassi F, Modolell J, Gomez-Skarmeta JL. The Iroquois family of genes: from body building to neural patterning. *Development* 2001; 128:2847-2855.
  17. Gomez-Skarmeta JL, Modolell J. Iroquois genes: genomic organization and function in vertebrate neural development. *Curr Opin Genet Dev* 2002; 12:403-408.
  18. Houweling AC, Dildrop R, Peters T, Mummenhoff J, Moorman AF, Ruther U, Christoffels VM. Gene and cluster-specific expression of the Iroquois family members during mouse development. *Mech Dev* 2001; 107:169-174.
  19. Jorgensen JS, Gao L. *Irx3* is differentially up-regulated in female gonads during sex determination. *Gene Expr Patterns* 2005; 5:756-762.
  20. Fu A, Koth ML, Brown RM, Shaw SA, Wang L, Krentz KJ, Zhang X, Hui CC, Jorgensen JS. *IRX3* and *IRX5* collaborate during ovary development and follicle formation to establish responsive granulosa cells in the adult mouse. *Biol Reprod* 2020; 103:620-629.
  21. Jiang JY, Macchiarelli G, Tsang BK, Sato E. Capillary angiogenesis and degeneration in bovine ovarian antral follicles. *Reproduction* 2003; 125:211-223.
  22. Yamada OA, M.; Takhana, K.; Iwasa, K.; Hiraga, T.; Hiratsuka, T. Microvasculature of mature bovine follicles and its changes with ovulation. *Journal of Reproduction and Development* 1994; 40:307-315.
  23. Ferrara N, Carver-Moore K, Chen H, Dowd M, Lu L, O'Shea KS, Powell-Braxton L, Hillan KJ, Moore MW. Heterozygous embryonic lethality induced by targeted inactivation of the VEGF gene. *Nature* 1996; 380:439-442.
  24. Paria BC, Huet-Hudson YM, Dey SK. Blastocyst's state of activity determines the "window" of implantation in the receptive mouse uterus. *Proc Natl Acad Sci U S A* 1993; 90:10159-10162.
  25. Tseng LH, Chen I, Chen MY, Yan H, Wang CN, Lee CL. Genome-based expression profiling as a single standardized microarray platform for the diagnosis of endometrial disorder: an array of 126-gene model. *Fertil Steril* 2010; 94:114-119.
  26. Zhang D, Sun C, Ma C, Dai H, Zhang W. Data mining of spatial-temporal expression of genes in the human endometrium during the window of implantation. *Reprod Sci* 2012; 19:1085-1098.



27. Chan C, Virtanen C, Winegarden NA, Colgan TJ, Brown TJ, Greenblatt EM. Discovery of biomarkers of endometrial receptivity through a minimally invasive approach: a validation study with implications for assisted reproduction. *Fertil Steril* 2013; 100:810-817.
28. Gellersen B, Brosens IA, Brosens JJ. Decidualization of the human endometrium: mechanisms, functions, and clinical perspectives. *Semin Reprod Med* 2007; 25:445-453.
29. Jahn E, Classen-Linke I, Kusche M, Beier HM, Traub O, Grummer R, Winterhager E. Expression of gap junction connexins in the human endometrium throughout the menstrual cycle. *Hum Reprod* 1995; 10:2666-2670.
30. Yu J, Berga SL, Zou W, Yook DG, Pan JC, Andrade AA, Zhao L, Sidell N, Bagchi IC, Bagchi MK, Taylor RN. IL-1beta Inhibits Connexin 43 and Disrupts Decidualization of Human Endometrial Stromal Cells Through ERK1/2 and p38 MAP Kinase. *Endocrinology* 2017; 158:4270-4285.
31. Nair RR, Jain M, Singh K. Reduced expression of gap junction gene connexin 43 in recurrent early pregnancy loss patients. *Placenta* 2011; 32:619-621.
32. Nevin RL. Mefloquine blockade of connexin 43 (Cx43) and risk of pregnancy loss. *Placenta* 2011; 32:712.
33. Ackert CL, Gittens JE, O'Brien MJ, Eppig JJ, Kidder GM. Intercellular communication via connexin43 gap junctions is required for ovarian folliculogenesis in the mouse. *Developmental Biology* 2001; 233:258-270.
34. Winterhager E, Kidder GM. Gap junction connexins in female reproductive organs: implications for women's reproductive health. *Hum Reprod Update* 2015; 21:340-352.

## Figure Legends

### Fig 1: *Irx3*<sup>LacZ/LacZ</sup> causes deficits in uterine vascularization and subfertility.

(A-D) H&E staining of D7 control (A, C n=6) and *Irx3*<sup>LacZ/LacZ</sup> (B, D n=6) pregnant uteri. Scale bars, 250 $\mu$ m. The white box in A and B are enlarged in C and D, respectively. A: anti-mesometrial; M: mesometrial; E: embryo. (E, F) Circulating Estrogen (E) and Progesterone (F) were measured at D7 of gestation (WT n=10; *Irx3*<sup>LacZ/LacZ</sup> n=6). (G) Average number of implantation sites *in utero* at D7 (WT n=8; *Irx3*<sup>LacZ/LacZ</sup> n=7) and D11 (WT n=3; *Irx3*<sup>LacZ/LacZ</sup> n=5). Data in G represents the mean  $\pm$  SEM. Statistics: two-sample t-test, \* : p<0.05; \*\* : p<0.01.

### Fig 2: *Irx3* expression coincides with embryo implantation.

(A-F) Immunofluorescence of IRX3 (red) co-labeled with DAPI, a nuclear marker (blue) throughout pregnancy days 4-7 in wild type mice implantation sites (n=3). Scale bars represent 250 $\mu$ m. L: lumen; S: stroma; E: embryo; M: mesometrial; A: anti-mesometrial. (I) Characterization of *Irx3* transcripts in the WT pregnant mouse uterus at days 4-7 (D4-7). Real time qPCR was determined by setting the expression level of *Irx3* mRNA on D4 of pregnancy to 1.0. Results are reported relative to 36b4 (n=3). Data represent the mean  $\pm$  SEM of three biological replicates performed in triplicate at each time point.

### Fig 3: Decidualization is impaired in pregnant *Irx3*<sup>LacZ/LacZ</sup> uteri.

(A) Real time qPCR was performed using total RNA isolated from implantation sites from pregnant uteri of WT (stippled light gray) and *Irx3*<sup>LacZ/LacZ</sup> (dark gray) females on day 7 of pregnancy. Data represents the mean  $\pm$  SEM of three biological replicates performed in triplicate at each time point. Fold change was calculated relative to transcript levels of the WT sample. Statistics: Student's t-test, \*p  $\leq$  0.05. (B) Immunofluorescence of HAND2, a stromal cell marker (red) co-localized with DAPI, a nuclear marker (blue) at gestation D7 in control (n=4) and *Irx3*<sup>LacZ/LacZ</sup> (n=3) implantation sites. Scale bars represent 250 $\mu$ m.

**Fig 4: *Irx3*<sup>LacZ/LacZ</sup> uteri exhibit impaired vascularization by day 7 of gestation.**

(A-F) Immunofluorescence of platelet endothelial cell adhesion molecule (PECAM, CD31, red) co-labeled with DAPI, a nuclear marker (blue) at pregnancy D7 in control (A, C, E, n=3) and *Irx3*<sup>LacZ/LacZ</sup> (B, D, F, n=3) implantation sites. Scale bars represent 250 $\mu$ m. E: embryo; M: mesometrial; A: anti-mesometrial. (G) Quantification of relative CD31 fluorescence intensity in the anti-mesometrium (AM) and mesometrium (M). Data represents Mean  $\pm$  SEM. Statistics: two-sample t-test; \*\*: p<0.01.

**Fig 5: *Irx3*<sup>LacZ/LacZ</sup> uteri express similar *Gja1* transcripts but abnormal GJA1 protein.**

(A) Real time qPCR results for *Gja1* from pregnant uteri of WT and *Irx3*<sup>LacZ/LacZ</sup> females on D7 of pregnancy. Data represents the mean  $\pm$  SEM of three biological replicates performed in triplicate at each time point. Fold change was calculated relative to transcript levels of the WT sample. Statistics: Student's t-test, \*p  $\leq$  0.05. (B-I) Immunofluorescence of gap junction protein 1 (connexin 43, GJA1, green) co-labeled with DAPI, a nuclear marker (blue) at gestation D7 in control (B, D, F, H, n=4) and *Irx3*<sup>LacZ/LacZ</sup> (C, E, G, I, n=5) implantation sites. Images are represented in increasing magnification, scale bars represent 250 $\mu$ m. Arrows highlight single cells that are enlarged within the inset of H and I. (J) Quantification of relative GJA1 fluorescence intensity in the anti-mesometrium (AM, p = 0.01) and mesometrium (M, p = 0.027) in wild type (white bars) vs *Irx3*<sup>LacZ/LacZ</sup> females (light gray bars). Data represents Mean  $\pm$  SEM. Statistics: two-sample t-test, \*: p<0.05; \*\*: p<0.01.

## Figure 1

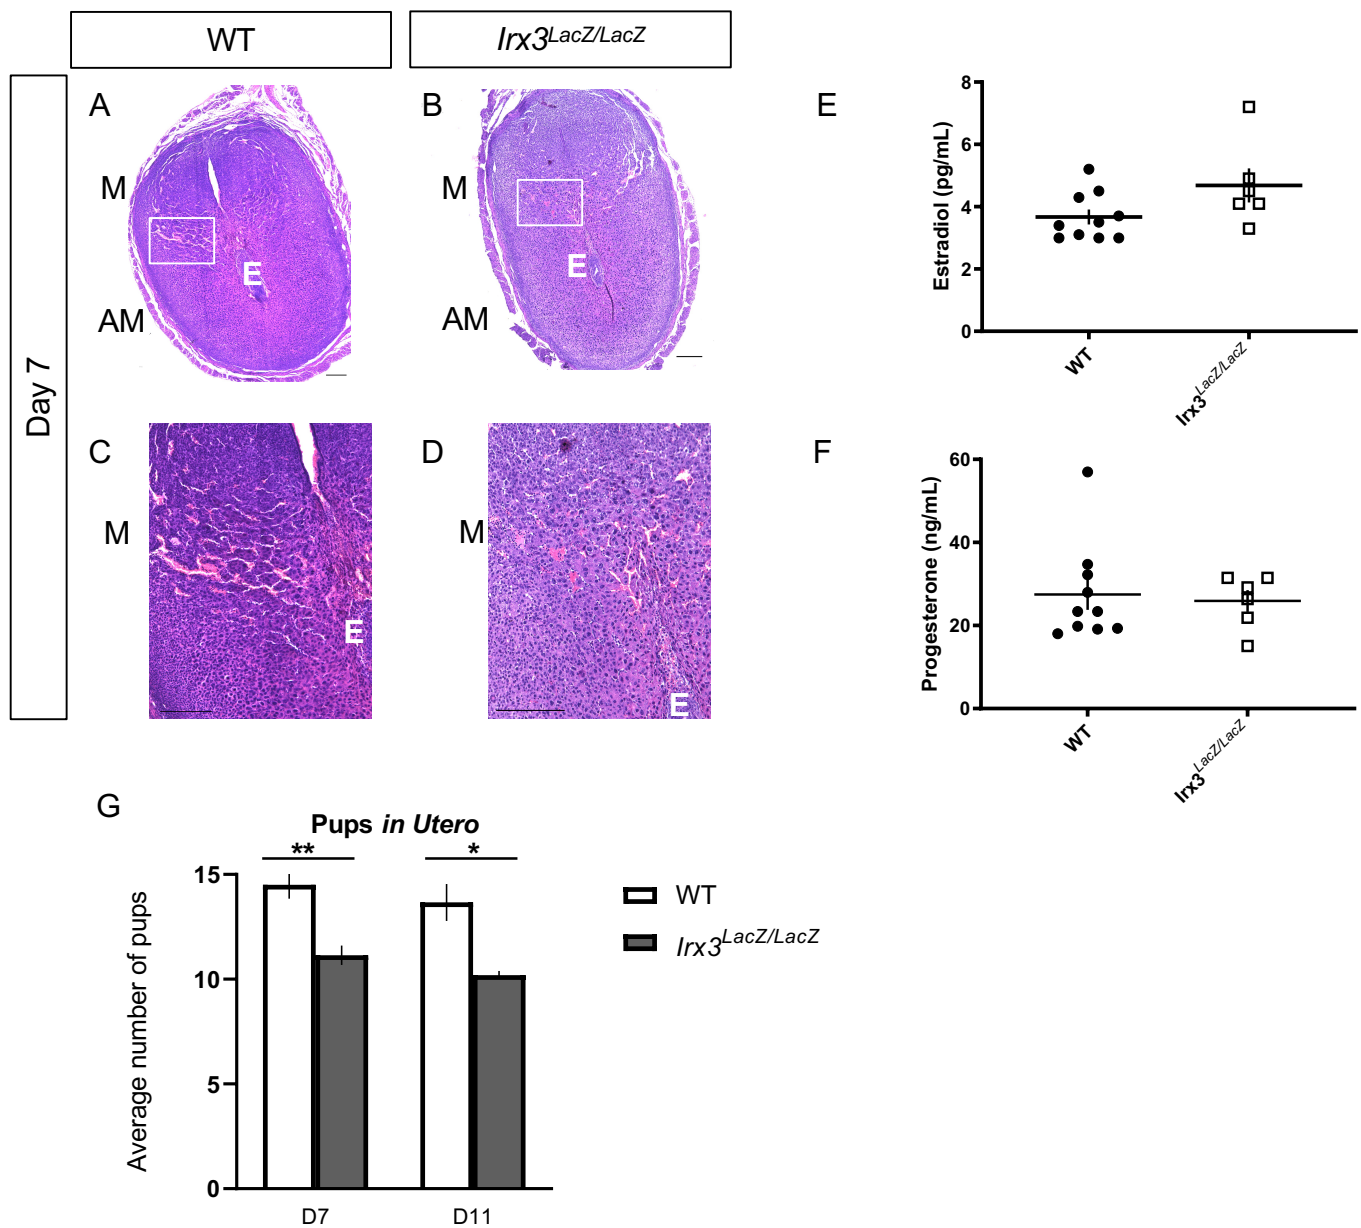

### Fig 1: *Irx3<sup>LacZ/LacZ</sup>* causes deficits in uterine vascularization and subfertility.

(A-D) H&E staining of D7 control (A, C n=6) and *Irx3<sup>LacZ/LacZ</sup>* (B, D n=6) pregnant uteri. Scale bars, 250 $\mu$ m. The white box in A and B are enlarged in C and D, respectively. A: anti-mesometrial; M: mesometrial; E: embryo. (E, F) Circulating Estrogen (E) and Progesterone (F) were measured at D7 of gestation (WT n=10; *Irx3<sup>LacZ/LacZ</sup>* n=6). (G) Average number of implantation sites *in utero* at D7 (WT n=8; *Irx3<sup>LacZ/LacZ</sup>* n=7) and D11 (WT n=3; *Irx3<sup>LacZ/LacZ</sup>* n=5). Data in G represents the mean  $\pm$  SEM. Statistics: two-sample t-test, \* : p<0.05; \*\* : p<0.01.

Figure 2

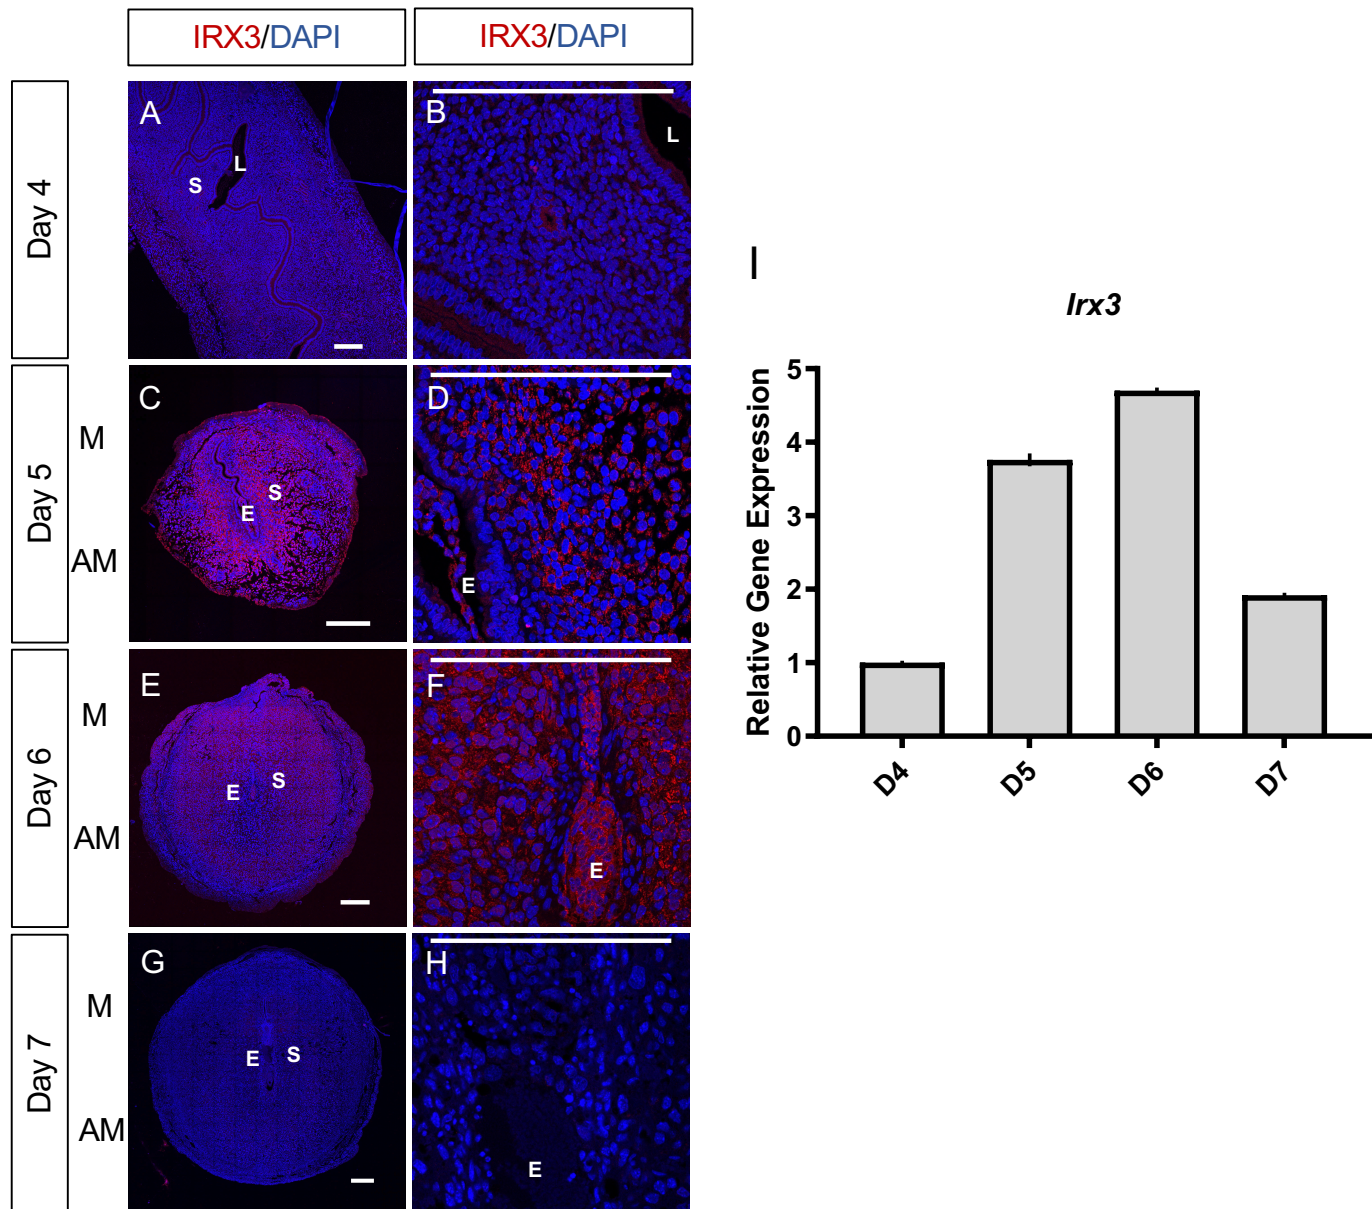

**Fig 2: *Irx3* expression coincides with embryo implantation.**

(A-F) Immunofluorescence of IRX3 (red) co-labeled with DAPI, a nuclear marker (blue) throughout pregnancy days 4-7 in wild type mice implantation sites (n=3). Scale bars represent 250 $\mu$ m. L: lumen; S: stroma; E: embryo; M: mesometrial; A: anti-mesometrial. (I) Characterization of *Irx3* transcripts in the WT pregnant mouse uterus at days 4-7 (D4-7). Real time qPCR was determined by setting the expression level of *Irx3* mRNA on D4 of pregnancy to 1.0. Results are reported relative to *36b4* (n=3). Data represent the mean  $\pm$  SEM of three biological replicates performed in triplicate at each time point.

### Figure 3

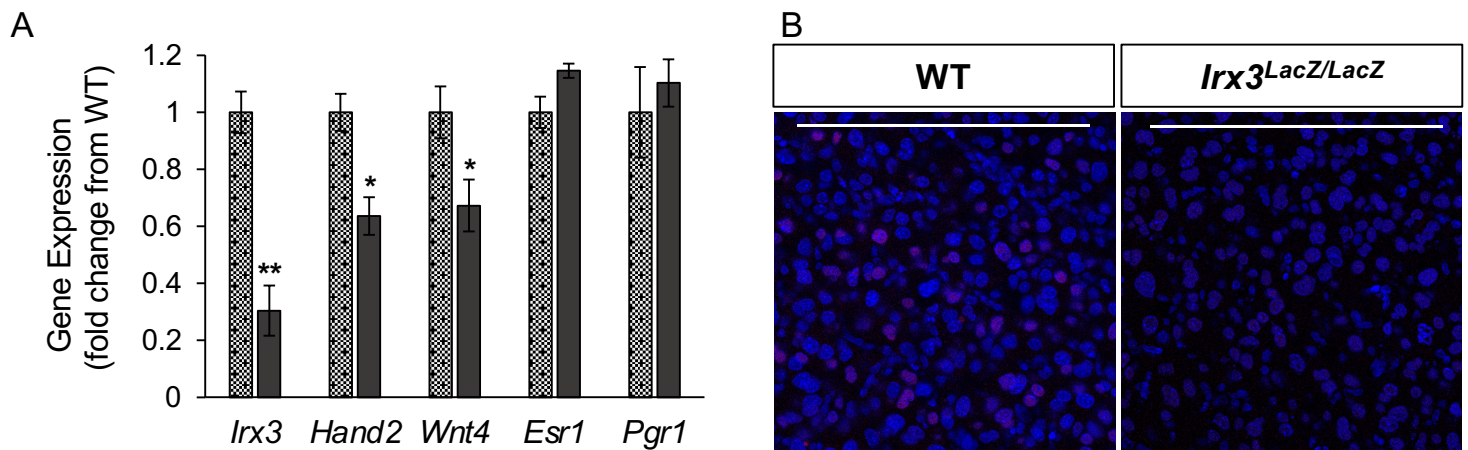

#### Fig 3: Decidualization is impaired in pregnant *Irx3<sup>LacZ/LacZ</sup>* uteri.

(A) Real time qPCR was performed using total RNA isolated from implantation sites from pregnant uteri of WT (stippled light gray) and *Irx3<sup>LacZ/LacZ</sup>* (dark gray) females on day 7 of pregnancy. Data represents the mean  $\pm$  SEM of three biological replicates performed in triplicate at each time point. Fold change was calculated relative to transcript levels of the WT sample. Statistics: Student's t-test, \* $p \leq 0.05$ . (B) Immunofluorescence of HAND2, a stromal cell marker (red) co-localized with DAPI, a nuclear marker (blue) at gestation D7 in control (n=4) and *Irx3<sup>LacZ/LacZ</sup>* (n=3) implantation sites. Scale bars represent 250 μm.

Figure 4

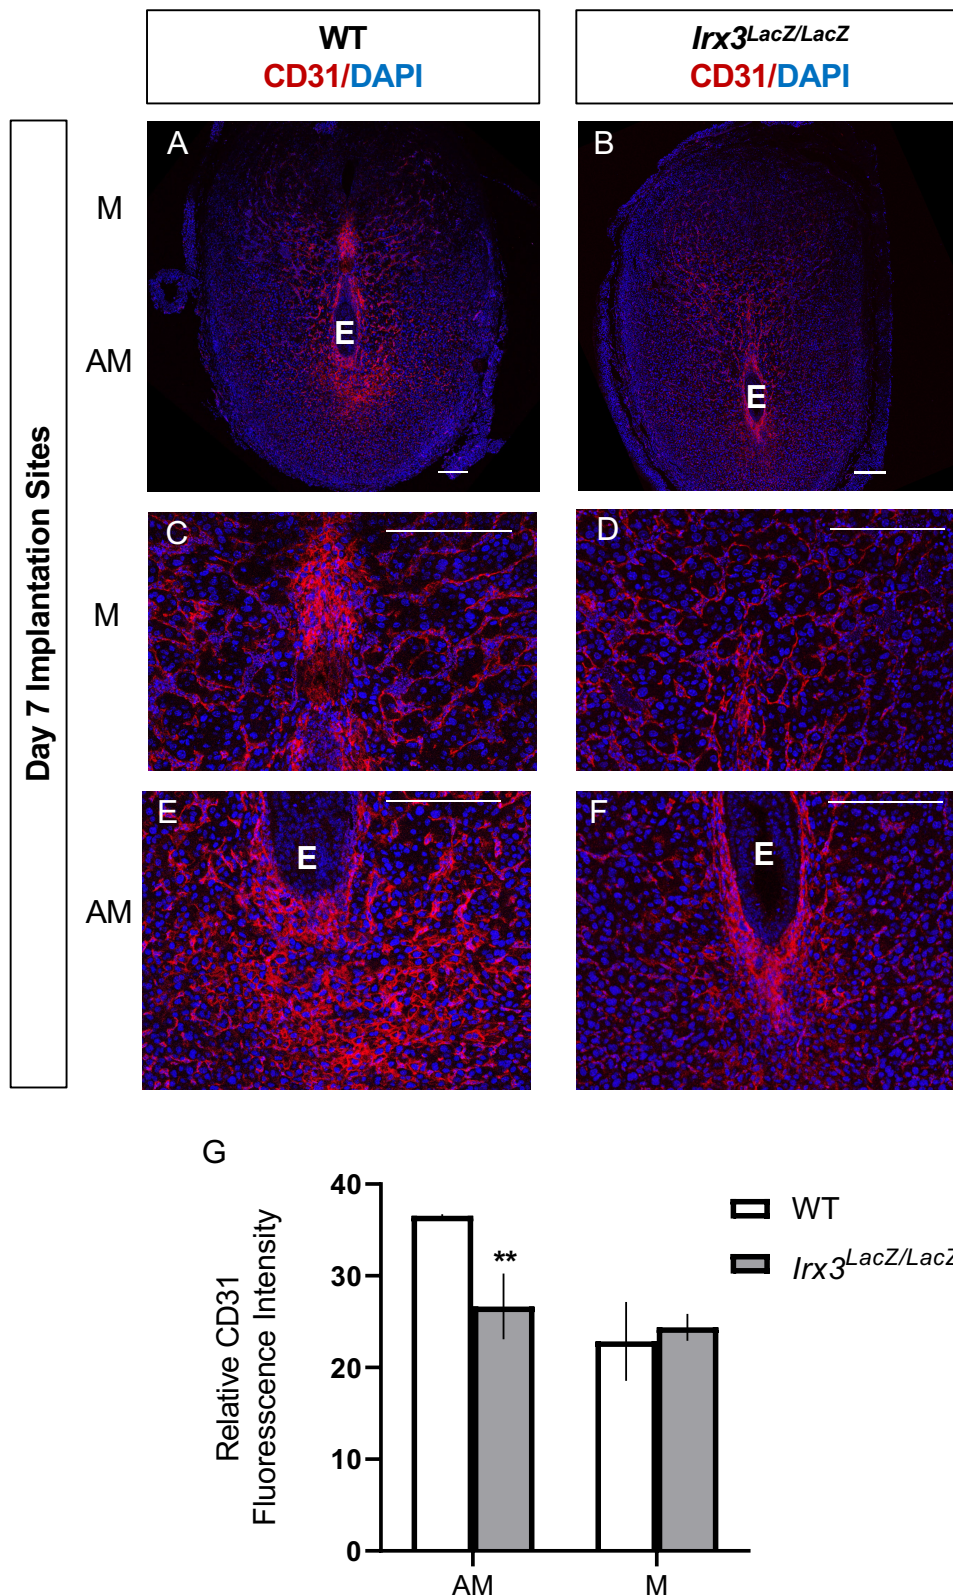

**Fig 4: *Irx3<sup>LacZ/LacZ</sup>* uteri exhibit impaired vascularization by day 7 of gestation.**

(A-F) Immunofluorescence of platelet endothelial cell adhesion molecule (PECAM, CD31, red) co-labeled with DAPI, a nuclear marker (blue) at pregnancy D7 in control (A, C, E, n=3) and *Irx3<sup>LacZ/LacZ</sup>* (B, D, F, n=3) implantation sites. Scale bars represent 250 $\mu$ m. E: embryo; M: mesometrial; A: anti-mesometrial. (G) Quantification of relative CD31 fluorescence intensity in the anti-mesometrium (AM) and mesometrium (M). Data represents Mean  $\pm$  SEM. Statistics: two-sample t-test; \*\* : p<0.01.

Figure 5

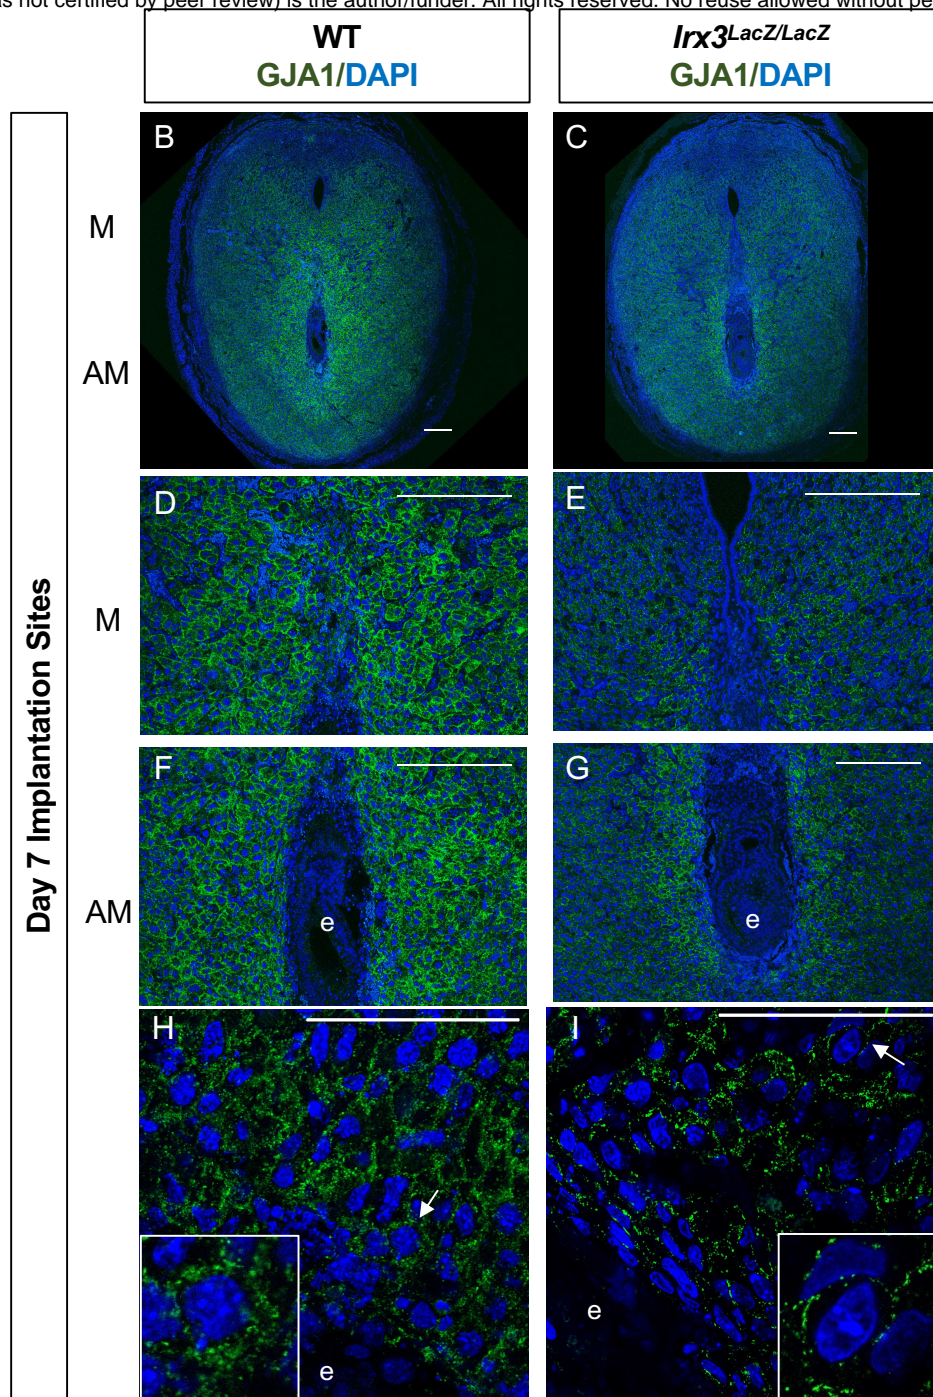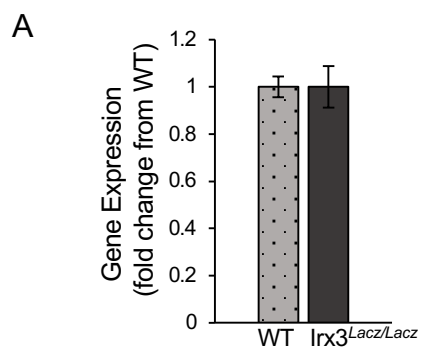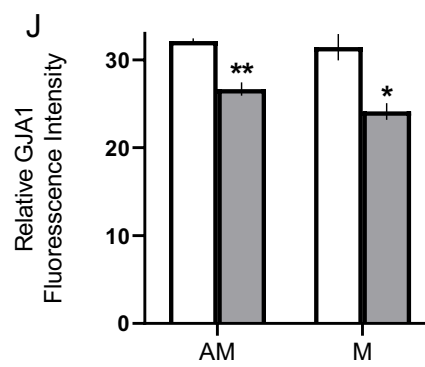



**Fig 5: *Irx3<sup>LacZ/LacZ</sup>* uteri express similar *Gja1* transcripts but abnormal GJA1 protein.**

(A) Real time qPCR results for *Gja1* from pregnant uteri of WT and *Irx3<sup>LacZ/LacZ</sup>* females on D7 of pregnancy. Data represents the mean  $\pm$  SEM of three biological replicates performed in triplicate at each time point. Fold change was calculated relative to transcript levels of the WT sample. Statistics: Student's t-test, \* $p \leq 0.05$ . (B-I) Immunofluorescence of gap junction protein 1 (connexin 43, GJA1, green) co-labeled with DAPI, a nuclear marker (blue) at gestation D7 in control (B, D, F, H, n=4) and *Irx3<sup>LacZ/LacZ</sup>* (C, E, G, I, n=5) implantation sites. Images are represented in increasing magnification, scale bars represent 250 $\mu$ m. Arrows highlight single cells that are enlarged within the inset of H and I. (J) Quantification of relative GJA1 fluorescence intensity in the anti-mesometrium (AM,  $p = 0.01$ ) and mesometrium (M,  $p = 0.027$ ) in wild type (white bars) vs *Irx3<sup>LacZ/LacZ</sup>* females (light gray bars). Data represents Mean  $\pm$  SEM. Statistics: two-sample t-test, \*:  $p < 0.05$ ; \*\*:  $p < 0.01$ .

## Supplementary Table 1

**Supplementary Table S1:** Antibody Information

| <b>Antibody</b> | <b>Dilution</b> | <b>Company</b> | <b>Catalogue number</b> | <b>Antigen Retrieval</b> |
|-----------------|-----------------|----------------|-------------------------|--------------------------|
| IRX3            | 1:100           | Invitrogen     | PA5-35149               | EDTA                     |
| HAND2           | 1:50            | Abcam          | ab200040                | Citrate                  |
| FRA1            | 1:100           | Invitrogen     | PA5-76185               | Citrate                  |
| CD31            | 1:200           | Abcam          | ab182981                | EDTA                     |
| GJA1            | 1:250           | Abcam          | ab11370                 | Citrate                  |
